1 **Thermostable mutants of glycoside hydrolase family 6 cellobiohydrolase from the**  
2 **basidiomycete *Phanerochaete chrysosporium***

3

4 Sora Yamaguchi<sup>1</sup>, Naoki Sunagawa<sup>1</sup>, Mikako Tachioka<sup>1,2</sup>, Kiyohiko Igarashi<sup>1,3†</sup>, and  
5 Masahiro Samejima<sup>1,4</sup>

6

7 <sup>1</sup>*Department of Biomaterial Sciences, Graduate School of Agricultural and Life*  
8 *Sciences, The University of Tokyo (Yayoi, Bunkyo-ku, Tokyo 113-8657, Japan)*

9 <sup>2</sup>*Deep-Sea Nanoscience Research Group, Research Center for Bioscience and*  
10 *Nanoscience, Japan Agency for Marine-Earth Science and Technology (Natsushima-*  
11 *cho, Yokosuka-city, Kanagawa, 237-0061, Japan)*

12 <sup>3</sup>*VTT Technical Research Center of Finland Ltd. (Tietotie 2, P.O.Box 1000, Espoo, FI-*  
13 *02044 VTT, Finland)*

14 <sup>4</sup>*Faculty of Engineering, Shinshu University (Wakasato, Nagano 380-8553, Japan)*

15

16 †Corresponding author (Tel. +81-3-5841-5258, Fax. +81-3-5841-5273, E-mail:  
17 [aquarius@mail.ecc.u-tokyo.ac.jp](mailto:aquarius@mail.ecc.u-tokyo.ac.jp), ORCID ID: 0000-0001-5152-7177)

18

19 Abbreviations: CBH, cellobiohydrolase; CBM, carbohydrate-binding module; CD,  
20 catalytic domain; GH, glycoside hydrolase; PASC, phosphoric acid-swollen cellulose;  
21 WT, wild type

22

23 **Regular paper**

24 Running title: Thermostable mutants of *Phanerochaete chrysosporium* Cel6A

25

26 **Abstract:** Thermal inactivation of saccharifying enzymes is a crucial issue for the  
27 efficient utilization of cellulosic biomass as a renewable resource. Cellobiohydrolases  
28 (CBHs) is a kind of cellulase. In general, CBHs belonging to glycoside hydrolase (GH)  
29 family 6 (Cel6) act synergistically with CBHs of GH family 7 (Cel7) and other  
30 carbohydrate-active enzymes during the degradation of cellulosic biomass. However,  
31 while the catalytic rate of enzymes generally becomes faster at higher temperatures,  
32 Cel6 CBHs are inactivated at lower temperatures than Cel7 CBHs, and this represents a  
33 limiting factor for industrial utilization. In this study, we produced a series of mutants of  
34 the glycoside hydrolase family 6 cellobiohydrolase *PcCel6A* from the fungus  
35 *Phanerochaete chrysosporium*, and compared their thermal stability. Eight mutants from  
36 a random mutagenesis library and one rationally designed mutant were selected as  
37 candidate thermostable mutants and produced by heterologous expression in the yeast  
38 *Pichia pastoris*. Comparison of the hydrolytic activities at 50 and 60 °C indicated that  
39 the thermal stability of *PcCel6A* is influenced by the number and position of cysteine  
40 residues that are not involved in disulfide bonds.

41

42 **Key words:** cellobiohydrolase, random mutagenesis, protein engineering, glycoside  
43 hydrolase, enzymatic saccharification

44

## 45 INTRODUCTION

46 Cellulosic biomass is the most abundant carbon stock in nature, and its  
47 degradation to soluble sugars has the potential to replace fossil resources by providing  
48 an alternative raw material for fuels and chemicals. Further, as enzymatic  
49 saccharification of cellulosic biomass would not require strong acid or alkali, or intense  
50 heat, it should involve lower energy consumption than chemical or physical treatments.  
51 Cellobiohydrolases (CBHs) are a kind of cellulase and indispensable for the complete  
52 enzymatic hydrolysis of cellulose because they can degrade crystalline regions that are  
53 resistant to enzymatic hydrolysis by removing cellobiosyl units from the cellulose chain  
54 ends.<sup>1)</sup> Nevertheless, the degradation of highly crystalline cellulose remains a key  
55 bottleneck for achieving efficient enzymatic saccharification.

56 CBHs that degrade crystalline cellulose are classified into either glycoside  
57 hydrolase family 6 (Cel6, EC.3.2.1.91) or 7 (Cel7, EC.3.2.1.176) in the Carbohydrate-  
58 Active enZyme (CAZy) database (<http://www.cazy.org/>).<sup>2)</sup> Most Cel6 and Cel7 CBHs  
59 have a carbohydrate-binding module (CBM) and a catalytic domain (CD), which are  
60 connected by a flexible linker. Fungal Cel6 CBHs are important, because their  
61 hydrolytic activity is comparable to that of Cel7 CBHs, and synergistic hydrolysis  
62 occurs when crystalline cellulose is incubated with both Cel6 and Cel7 together.<sup>3)4)</sup>  
63 However, the thermal stability of Cel6 CBHs is generally lower than that of Cel7 CBHs.  
64 For example, the optimum temperatures of Cel6 and Cel7 CBHs from the thermophilic  
65 filamentous fungus *Chaetomium thermophilum* are 50 °C<sup>5)</sup> and 65 °C,<sup>1)</sup> respectively.  
66 This is a problem, because industrial-scale enzymatic saccharification is conducted at an  
67 elevated temperature to increase the hydrolysis rate. Therefore, increasing the thermal  
68 stability of Cel6 CBH should immediately lead to an increase in the efficiency of the  
69 commercial process.

70 Numerous studies have attempted to improve the thermal stability of Cel6 by  
71 applying two major strategies, i.e., random mutagenesis and rational design. Random  
72 mutagenesis is generally employed when information about the target enzyme is  
73 limited. On the other hand, in the process of rational design, key amino acid(s) to be  
74 changed are firstly identified based on the enzyme structure and the interaction between  
75 enzyme and substrate, and then the designed mutants are prepared and characterized.<sup>6)</sup>

76 The methylotrophic yeast *Pichia pastoris* is a suitable host for the expression  
77 of fungal Cel6 CBHs because it performs post-translational modifications found in the  
78 eukaryote and it can secrete the fungal proteins in up to gram quantities per liter of  
79 culture.<sup>7)</sup> For example, production of Cel6A CBH from the wood-decaying fungus  
80 *Phanerochaete chrysosporium* (*PcCel6A*) in *P. pastoris* is as much as 4.6 g/L at 160  
81 hours of cultivation.<sup>8)</sup> Therefore, random mutagenesis combined with expression in *P.*  
82 *pastoris* has been employed to improve the catalytic efficiency and thermal stability of  
83 fungal Cel6 CBHs.<sup>5)9)</sup> However, the contribution of each individual mutation to the  
84 activity of mutants with multiple mutations has not been investigated, e.g., by preparing  
85 mutants with each single mutation, although this information would be useful for  
86 rationally enhancing the activity even further.

87 Regarding the rational design of thermostable Cel6 CBHs, free cysteine (cysteine  
88 residues that do not form a disulfide bond) has been a target of substitution.<sup>10)11)</sup> These  
89 studies analyzed the thermal stability of the mutants by measuring the incubation  
90 temperature at which the enzyme loses 50% of its activity, the residual activity, and the  
91 half-life. However, these methods do not provide information about the hydrolytic  
92 activity during incubation with substrates at elevated temperatures, though this ability is  
93 critical for achieving more efficient saccharification of cellulosic biomass.

94 In the present study, therefore, we heterologously expressed in *P. pastoris* a series

95 of mutants of fungal *PcCel6A* with substitutions based on either random mutagenesis<sup>9)</sup>  
96 or rational design.<sup>11)</sup> We compared the activities of these mutants by incubating them  
97 with amorphous phosphoric acid-swollen cellulose or crystalline cellulose III<sub>I</sub> at  
98 different temperatures. Based on the results, we discuss the critical features for  
99 increased thermal stability of *PcCel6A*.

100

## 101 **MATERIALS AND METHODS**

102 *Materials.* DNA polymerases PrimeSTAR Max (TaKaRa Bio Inc., Shiga, Japan) and  
103 KOD-Plus (Ver.2; Toyobo Co., Ltd, Osaka, Japan) were used to amplify mutated DNA.  
104 One Shot<sup>®</sup> TOP10 Chemically Competent *E. coli* (Thermo Fisher Scientific Inc., MA,  
105 USA) was used to amplify the plasmid. *PmeI* (New England Biolabs, MA, USA) was  
106 used to linearize the amplified plasmid for the transformation of *P. pastoris* strain  
107 KM71H, which was used for heterologous production of the mutant enzymes. Yeast  
108 (BD Biosciences, Miami, USA), peptone (Nihon Pharmaceutical Co., Ltd, Tokyo,  
109 Japan), and glycerol (FUJIFILM Wako Pure Chemical Corporation, Osaka, Japan) were  
110 used for the medium. Phosphoric acid-swollen cellulose (PASC) was prepared as  
111 reported.<sup>12)</sup> Cellulose I<sub>α</sub> and III<sub>I</sub> were prepared from green algae *Cladophora spp.*  
112 according to the reported method.<sup>13)</sup> *Aspergillus niger* β-glucosidase was acquired from  
113 Megazyme Ltd. (Wicklow, Ireland)

114

115 ***Construction of PcCel6A expression plasmids.*** Primers for the site-directed mutations  
116 are listed in Table S1. Mutant libraries were constructed by inverse PCR using these  
117 primers, and pPICZα vector (Thermo Fisher Scientific) containing *PcCel6A*  
118 C240S/C393S gene with a *P. pastoris* codon bias was synthesized by Genscript Biotech  
119 Corporation (NJ, USA). PCR reaction mixture was purified with the Wizard<sup>®</sup> SV Gel

120 PCR Clean-Up System (Promega Corporation, WI, USA). One Shot<sup>®</sup> TOP10  
121 Chemically Competent *Escherichia coli* (Thermo Fisher Scientific) cells were  
122 transformed to amplify the mutated genes, and the plasmids were extracted from *E. coli*.  
123 Approximately 5 µg of each *PcCel6A* mutant gene in pPICZα was linearized by  
124 restriction enzyme *PmeI* (New England Biolabs) for the transformation of *P. pastoris* by  
125 electroporation.

126

127 **Enzyme expression in *Pichia pastoris*.** The mutant *PcCel6A* library was produced by  
128 heterologous expression in *P. pastoris* strain KM71H (Thermo Fisher Scientific). *P.*  
129 *pastoris* containing wild-type *PcCel6A* gene was produced according to the reported  
130 method.<sup>14)</sup> Colonies containing WT or mutant *PcCel6A* genes were grown in 1% yeast,  
131 2% peptone (YP) medium with 2% glycerol at 30 °C. Then, expression was induced in  
132 YP medium at 26.5 °C by the addition of methanol (1% (v/v), final concentration) every  
133 other day. Aliquots of 80 µl of yeast culture were sampled for 3 days after the induction  
134 of the enzyme expression and centrifuged at 4 °C with 10,000 x g for 10 min. The third-  
135 day culture was centrifuged at 4 °C with 3,000 x g for 5 min and centrifuged again at  
136 15,000 x g for 10 min at 4 °C. The protein concentration of the supernatants was  
137 determined using Bio-Rad Protein Assay Dye Reagent Concentrate (Bio-rad  
138 Laboratories, Inc., CA, USA); the absorbance was measured at 595 nm with a Thermo  
139 Scientific Multiscan<sup>®</sup> GO (Thermo Fisher Scientific). The expression level of enzymes  
140 was evaluated by SDS-PAGE using 12% polyacrylamide gel. A picture of the gel was  
141 taken with a CanoScan (Canon Inc., Tokyo, Japan) at 50% exposure time. The image  
142 was modified to change the shape of the lanes from trapezoidal to rectangular by using  
143 GIMP (Ver. 2.10.14.0, <https://www.gimp.org>) and converted to a 32-bit gray scale with  
144 ImageJ (Ver.1.52a, <https://imagej.nih.gov/ij/>). The amount of *PcCel6A* was estimated as

145 the peak area of bands between 50 and 75 kDa.

146

147 *Activity measurements of crude enzymes.* Culture supernatants of WT or mutant  
148 *PcCel6A* (10  $\mu$ L) were incubated with 100  $\mu$ g of PASC or cellulose III<sub>I</sub> prepared as  
149 described previously<sup>12)13)</sup> in 100 mM sodium acetate buffer (pH 5.0) using 96-well  
150 plates at 50 or 60 °C with shaking at 1,000 rpm. After two hours of incubation, the  
151 solutions were filtered using 96-well plates with a 0.22  $\mu$ m filter (MultiScreen® Filter  
152 Plates, Merck Millipore, MA, USA). Then, 5  $\mu$ L of 40 U/mL *Aspergillus niger*  $\beta$ -  
153 glucosidase (Megazyme Ltd.) was added to 100  $\mu$ L of filtrate, and the plates were  
154 incubated at 60 °C for 48 h with shaking at 1,000 rpm. After hydrolysis, the solutions  
155 were heated at 98 °C for 3 min and filtered again. The concentration of glucose in  
156 filtrate was quantified using Glucose CII-Test Wako (FUJIFILM Wako Pure Chemical  
157 Corporation) by measuring the absorbance at 492 nm with a Thermo Scientific  
158 Multiscan® FC (Thermo Fisher Scientific).

159

## 160 **RESULTS AND DISCUSSION**

161           Improving the thermal stability of fungal Cel6 CBHs is critical to increase the  
162 saccharification rate of cellulosic biomass, because these enzymes are the least stable  
163 among the cocktail of cellulolytic enzymes. The current study provides insights into the  
164 factors that determine the thermal stability of *PcCel6A*.

165

### 166 ***Preparation of PcCel6A mutants.***

167           Amino acid residues that were expected to influence the thermostability of  
168 *PcCel6A* were chosen based on reported experimental results of random mutagenesis<sup>9)</sup>  
169 or rational design,<sup>11)</sup> as shown in Fig. 1. Eight single mutations with different  
170 characteristics were chosen from the mutant library generated by introducing random  
171 mutations into wild-type *PcCel6A* in a *Pichia* expression system.<sup>9)</sup> Cys25 is located on  
172 the CBM and forms a disulfide bond with Cys8 in the CBM. Ala103 and Ala105 are  
173 located at the surface of the CD. Met257 was proposed to stabilize the side chain of the  
174 adjacent residue.<sup>15)</sup> Trp267 is located in the entrance of the active site tunnel. Gly346  
175 and Gly421 lie within the loop near the active site. G421A was selected because G421D  
176 was expected to have a higher specific activity based on a previous study,<sup>9)</sup> but the  
177 aspartic acid residue is large and acidic and might drastically change the enzyme  
178 structure. Cys240 and Cys393 should not form a disulfide bond because they are distant  
179 from other cysteine residues. The double mutant C240S/C393S was rationally designed  
180 as a candidate thermostable mutant by substituting the two cysteine residues with serine.

181

### 182 ***Expression amount of PcCel6A mutants.***

183           The total protein concentration expressed by transformed *P. pastoris* increased  
184 with cultivation time after the induction of protein expression by adding methanol to the



185 culture, as shown in Fig. 2. The production levels of W267C and G421D were higher  
186 than that of WT. The content of *PcCel6A* analyzed by SDS-PAGE did not reflect the  
187 protein concentration, presumably because of differences in glycosylation of the  
188 recombinant proteins. Therefore, we treated the samples with endoglycosylase H and  $\alpha$ -  
189 mannosidase to remove *N*-glycosylation at Asn398. As shown in Fig. 3, after the  
190 deglycosylation procedure, several bands were seen between 37 and 75 kDa. Since the  
191 molecular weight of *PcCel6A* calculated from the amino acid sequence is 46 kDa, these  
192 bands at various molecular weights presumably reflect glycosylation at other sites.  
193 Indeed, 25 and 8 Ser/Thr residues in the linker and CD, respectively, are predicted to be  
194 *O*-glycosylated by the NetOGlyc 4.0 Server (Ver. 4. 0. 0. 13),<sup>16)</sup> and it has been shown  
195 that the major hydrolysis products of *O*- and *N*-linked saccharides attached to a  
196 recombinant protein expressed in *P. pastoris* were *O*-linked dimeric to pentameric  
197 oligosaccharides.<sup>17)</sup> Hence, the amount of *O*-glycosylation can be estimated to  
198 correspond to 11 to 25 kDa, which is consistent with the idea that the difference in  
199 molecular weight of approximately 10 to 20 kDa between the thickest band of each  
200 mutant and the calculated value based on the amino acid sequence is due primarily to *O*-  
201 glycosylation. We consider that minor differences in the glycosylation amount among  
202 the mutants should have a negligible impact on our findings, because the effects of  
203 glycosylation of the CD of Cel6A CBH from *Trichoderma reesei* (*TrCel6A*) on the  
204 enzyme structure and interactions with a ligand were minimal.<sup>18)</sup>

205

### 206 ***Thermal properties of PcCel6A mutants.***

207 Hydrolytic activity in the culture supernatant of WT and mutant enzymes was  
208 tested using PASC and cellulose III<sub>I</sub> as substrates. As shown in Fig. 4A, specific  
209 activities of PASC hydrolysis by A103T, M257I, and C240S/C393S were significantly

210 improved, compared with WT, at 60 °C. However, when crystalline cellulose III<sub>I</sub> was  
211 used as a substrate, thermal inactivation of A103T, M257I, and WT apparently occurred  
212 at 60 °C, though the C240S/C393S double mutant remained active. Ala103 has an  $\alpha$ -  
213 helix at the surface of the enzyme. It was reported that many advantageous mutations of  
214 *PcCel6A* based on the sequences of thermophilic fungal Cel6 CBHs are located on the  
215 surface of the enzyme.<sup>15)</sup> Since A103T involves the substitution of compact Ala with  
216 bulky Thr, we speculate that its stability might be increased as a result of filling a cavity  
217 on the surface of the enzyme that would otherwise be accessible to the solvent. In a  
218 previous study, M257I showed an increase of 1.2 °C in the temperature required to  
219 reduce the initial activity by 50% within 120 min.<sup>15)</sup> This might be due to the  
220 substitution with a more hydrophobic amino acid, Ile, because Met257 is surrounded by  
221 hydrophobic side chains of amino acids in the  $\alpha$ -helix.<sup>14)</sup> If we compare the amino acid  
222 sequences of the characterized fungal cellobiohydrolase Cel6s, branched chain amino  
223 acids such as Leu that are more hydrophobic than Met appear frequently at the position  
224 corresponding to Met257 in *PcCel6A*. Thus, it is plausible that these hydrophobic  
225 residues improve the stability of the enzyme, since they are highly conserved among  
226 fungal Cel6 CBHs.

227         Comparison of the hydrolytic activities towards amorphous (PASC) versus  
228 crystalline cellulose (cellulose III<sub>I</sub>) is helpful to judge the origin of activity changes.  
229 When the activity is plotted by putting the glucose yield from PASC on the horizontal  
230 axis and that from cellulose III<sub>I</sub> on the vertical axis, we typically see second-degree  
231 polynomial curves, as we previously reported.<sup>9)</sup> The plot should deviate from the curve  
232 if the relative activity, i.e., amorphous vs. crystalline, is changed by mutation. As shown  
233 in Fig. 5, the activity of C25Y and W267C towards crystalline cellulose was lower at  
234 50 °C (Fig. 5A). Cys25 and Trp267 are located in the CBM and at the entrance to the

235 catalytic tunnel, respectively. Since Cys25 forms a disulfide bond with Cys8 in the  
236 CBM, and the replacement of Cys25 with Tyr hinders disulfide bond formation in the  
237 CBM, C25Y might reduce the affinity for the surface of crystalline cellulose. Trp267 is  
238 located at the entrance of the active site tunnel and plays an important role in the  
239 degradation of crystalline cellulose by guiding a cellulose chain into the tunnel, as  
240 demonstrated in the case of *TrCel6A*.<sup>19)</sup> Therefore, it seems likely that W267C was  
241 unable to take a cellulose chain into the active site tunnel efficiently following the  
242 substitution of the nonpolar amino acid Trp with the polar amino acid Cys. Moreover,  
243 the substitution of Trp267 with Cys introduces an additional free cysteine, which might  
244 negatively affect the expression or the stability of the mutant (Fig. 3). As shown in Fig.  
245 5C and 5D, the division of the glucose production by the protein amount in the reaction  
246 solution enables us to compare the catalytic efficiency itself, because it eliminates the  
247 effect of the expression level. Although A103T, M257I, and WT showed similar ratios  
248 of amorphous and crystalline cellulose degradation to C240S/C393S at 50°C (Fig. 5C),  
249 they showed reduced ability to degrade crystalline cellulose at 60 °C (Fig. 5D). The  
250 mechanism of this effect will be discussed later.

251         When the hydrolytic activity in the reaction at 50 °C is plotted on the horizontal  
252 axis against that at 60 °C on the vertical axis, most mutants lie on the same line, as  
253 shown in Fig. 6A and 6B. This regression line should reflect the increase in the activity  
254 due to the larger kinetic energy generated by raising the temperature in competition with  
255 the decrease in the activity due to thermal inactivation of the enzymes. However,  
256 C240S/C393S lies far above the line of WT (Fig. 6B), indicating that the double mutant  
257 really is a thermostable enzyme favorable for the degradation of amorphous and  
258 crystalline cellulose. It has been suggested that disulfide bond cleavage and thiol-  
259 disulfide exchange are involved in the thermal inactivation of fungal Cel6 CBHs,

260 because the mutants lacking free cysteine retain their activity to a certain extent even  
261 after incubation for 15 min at 90 °C, while the parent CBHs completely loses activity  
262 under these conditions.<sup>11)</sup> Oxidation of thiol might also have a negative effect.<sup>20)</sup>

263         These effects of free cysteine might explain the decline in the specific activity of  
264 A103T, M257I, and WT towards crystalline cellulose at 60 °C (Fig. 5D and 6D). As  
265 shown in Fig. 7, Gln187 and Cys408 that are supposed to be directly or indirectly  
266 interacting with Cys240 and Cys393, respectively, take double conformation. Therefore,  
267 thermal stabilization of C240S/C393S might be resulted from stabilizing these double  
268 conformational residues. Simulations suggest that processive cellobiohydrolases are  
269 more likely to perform the rate-limiting step of dissociation from crystalline cellulose  
270 by backing up along the cellulose chain without opening the substrate-enclosing loops  
271 rather than by opening the loops.<sup>21)</sup> The fact that the mobility of the C-terminal loop  
272 (amino acid 390-425) is calculated to be less than that of the N-terminal loop (amino  
273 acid 174-178)<sup>14)</sup> may be related to the existence of a disulfide bond (Cys361-Cys408)  
274 near Cys393. If Cys393 weakens this disulfide bond via Asn162 (and perhaps H<sub>2</sub>O), and  
275 the bond is consequently cleaved more readily, the C-terminal loop might not retain its  
276 immobile structure at higher temperature, which could interfere with dissociation of the  
277 enzyme from crystalline cellulose. Moreover, since the number of free cysteine residues  
278 is 0 in C240S/C393S, 3 in C25Y and W267C, and 2 in other mutants and WT, the  
279 specific activity towards amorphous cellulose at the higher temperature (Fig. 6C) might  
280 also be connected to the number of free cysteine residues in the enzyme.

281

## 282 **CONCLUSION**

283         In this work, we identified several mutants of *PcCel6A* that show higher  
284 activities than WT at 60 °C. Our results indicate that the number and position of free

285 cysteine residues are critical factors affecting the thermal stability of *PcCel6A*. We are  
286 currently conducting X-ray crystal structure analysis to better understand the structural  
287 basis of the thermal stabilization by the specific substitutions without depending on  
288 structure modeling. Our findings should be helpful to increase the efficiency of  
289 industrial-scale enzymatic saccharification of cellulose.

290

291 **CONFLICTS OF INTEREST**

292 We declare no interest or relationship that might constitute a potential conflict of  
293 interest.

294

295 **ACKNOWLEDGEMENTS**

296 S.Y. is grateful for financial support from UTokyo Sustainable Agriculture Education  
297 Program during a Master's course. The authors are grateful for Grants-in-Aid for  
298 Scientific Research (B) (15H04526, 18H02252 and 19H03013 to K.I.) from the Japan  
299 Society for the Promotion of Science (JSPS), a Grant-in-Aid for Innovative Areas from  
300 the Japanese Ministry of Education, Culture, Sports, and Technology (MEXT) (No.  
301 18H05494 to K.I.). In addition, K.I. thanks Business Finland (BF, formerly the Finnish  
302 Funding Agency for Innovation (TEKES)) for support via the Finland Distinguished  
303 Professor (FiDiPro) Program "Advanced approaches for enzymatic biomass utilization  
304 and modification (BioAD)".

305

306 **REFERENCES**

- 307 1) S. P. Voutilainen, T. Puranen, M. Siika-Aho, A. Lappalainen, M. Alapuranen, J.  
308 Kallio, S. Hooman, L. Viikri, J. Vehmaanperä, and A. Koivula: Cloning,  
309 expression, and characterization of novel thermostable family 7  
310 cellobiohydrolases. *Biotechnol. Bioeng.*, **101**, 515–528 (2008).
- 311 2) V. Lombard, H. Golaconda Ramulu, E. Drula, P. M. Coutinho, and B. Henrissat:  
312 The carbohydrate-active enzymes database (CAZy) in 2013. *Nucleic Acids Res.*,  
313 **42**, 490–495 (2014).
- 314 3) K. Igarashi, T. Uchihashi, A. Koivula, M. Wada, S. Kimura, T. Okamoto, M.  
315 Penttilä, T. Ando, and M. Samejima: Traffic jams reduce hydrolytic efficiency of  
316 cellulase on cellulose surface. *Science*, **333**, 1279–1282 (2011).
- 317 4) I. Wu, and F. H. Arnold: Engineered thermostable fungal Cel6A and Cel7A  
318 cellobiohydrolases hydrolyze cellulose efficiently at elevated temperatures.  
319 *Biotechnol. Bioeng.*, **110**, 1874–1883 (2013).
- 320 5) X. J. Wang, Y. J. Peng, L. Q. Zhang, A. N. Li, and D. C. Li: Directed evolution  
321 and structural prediction of cellobiohydrolase II from the thermophilic fungus  
322 *Chaetomium thermophilum*. *Appl. Microbiol. Biotechnol.*, **95**, 1469–1478 (2012).
- 323 6) Y. P. Zhang, M. E. Himmel, and J. R. Mielenz: Outlook for cellulase  
324 improvement : Screening and selection strategies. *Biotechnol. Adv.*, **24**, 452–481  
325 (2006).
- 326 7) S. Macauley-Patrick, M. L. Fazenda, B. McNeil, and L. M. Harvey:  
327 Heterologous protein production using the *Pichia pastoris* expression system.  
328 *Yeast*, **22**, 249–270 (2005).
- 329 8) K. Igarashi, M. Maruyama, A. Nakamura, T. Ishida, M. Wada, and M. Samejima:  
330 Degradation of crystalline celluloses by *Phanerochaete chrysosporium*

- 331 cellobiohydrolase II (Cel6A) heterologously expressed in methylotrophic yeast  
332 *Pichia pastoris*. *J. Appl. Glycosci.*, **59**, 105–110 (2012).
- 333 9) M. Tachioka, N. Sugimoto, A. Nakamura, N. Sunagawa, T. Ishida, T. Uchiyama,  
334 K. Igarashi, and M. Samejima: Development of simple random mutagenesis  
335 protocol for the protein expression system in *Pichia pastoris*. *Biotechnol.*  
336 *Biofuels*, **9**, 1–10 (2016).
- 337 10) P. Heinzelman, C. D. Snow, M. A. Smith, X. Yu, A. Kannan, K. Boulware, A.  
338 Villalobos, S. Govindarajan, J. Minshull, and F. H. Arnold: SCHEMA  
339 recombination of a fungal cellulase uncovers a single mutation that contributes  
340 markedly to stability. *J. Biol. Chem.*, **284**, 26229–26233 (2009).
- 341 11) I. Wu, T. Heel, and F. H. Arnold: Role of cysteine residues in thermal  
342 inactivation of fungal Cel6A cellobiohydrolases. *BBA - Proteins Proteomics*,  
343 **1834**, 1539–1544 (2013).
- 344 12) A. Nakamura, H. Watanabe, T. Ishida, T. Uchihashi, M. Wada, T. Ando, K.  
345 Igarashi, and M. Samejima: Trade-off between processivity and hydrolytic  
346 velocity of cellobiohydrolases at the surface of crystalline cellulose. *J. Am.*  
347 *Chem. Soc.*, **136**, 4584–4592 (2014).
- 348 13) M. Wada, H. Chanzy, Y. Nishiyama, and P. Langan: Cellulose III<sub>I</sub> crystal  
349 structure and hydrogen bonding by synchrotron X-ray and neutron fiber  
350 diffraction. *Macromolecules*, **37**, 8548–8555 (2004).
- 351 14) M. Tachioka, A. Nakamura, T. Ishida, K. Igarashi, and M. Samejima: Crystal  
352 structure of a family 6 cellobiohydrolase from the basidiomycete *Phanerochaete*  
353 *chrysosporium*. *Acta Crystallogr. Sect. F Struct. Biol. Commun.*, **73**, 398–403  
354 (2017).
- 355 15) Y. Ito, A. Ikeuchi, and C. Imamura: Advanced evolutionary molecular



- 356 engineering to produce thermostable cellulase by using a small but efficient  
357 library. *Protein Eng. Des. Sel.*, **26**, 73–79 (2013).
- 358 16) C. Steentoft, Y. Vakhrushev, H. J. Joshi, Y. Kong, M. B. Vester-christensen, K.  
359 T. Schjoldager, K. Lavrsen, S. Dabelsteen, N. B. Pedersen, L. Marcos-silva, R.  
360 Gupta, E. P. Bennett, U. Mandel, S. Brunak, H. H. Wandall, S. B. Levery, and H.  
361 Clausen: Precision mapping of the human *O*-GalNAc glycoproteome through  
362 SimpleCell technology. *EMBO J.*, **32**, 1478–1488 (2013).
- 363 17) J. G. Duman, R. G. Miele, H. Liang, D. K. Grella, K. L. Sim, F. J. Castellino, and  
364 R. K. Bretthauer: O-Mannosylation of *Pichia pastoris* cellular and recombinant  
365 proteins. *Biotechnol. Appl. Biochem.*, **28**, 39–45 (1998).
- 366 18) C. M. Payne, Y. J. Bomble, C. B. Taylor, C. McCabe, M. E. Himmel, M. F.  
367 Crowley, and G. T. Beckham: Multiple functions of aromatic-carbohydrate  
368 interactions in a processive cellulase examined with molecular simulation. *J.*  
369 *Biol. Chem.*, **286**, 41028–41035 (2011).
- 370 19) A. Koivula, T. Kinnari, V. Harjunpää, L. Ruohonen, A. Teleman, T. Drakenberg,  
371 J. Rouvinen, T. A. Jones, and T. T. Teeri: Tryptophan 272: An essential  
372 determinant of crystalline cellulose degradation by *Trichoderma reesei*  
373 cellobiohydrolase Cel6A. *FEBS Lett.*, **429**, 341–346 (1998).
- 374 20) V. Gupta, and K. S. Carroll: Sulfenic acid chemistry, detection and cellular  
375 lifetime. *Biochim. Biophys. Acta - Gen. Subj.*, **1840**, 847–875 (2014).
- 376 21) J. V. Vermaas, R. Kont, G. T. Beckham, M. F. Crowley, M. Gudmundsson, M.  
377 Sandgren, J. Ståhlberg, P. Våljamäe, and B. C. Knott: The dissociation  
378 mechanism of processive cellulases. *Proc. Natl. Acad. Sci. U. S. A.*, **116**, 23061–  
379 23067 (2019).
- 380

## 381 **Figure Legends**

### 382 **Fig. 1.** Residues of *PcCel6A* selected for mutagenesis.

383 Mutations C25Y, A103T, A105D, M257I, W267C, G346D, and G421D were  
384 selected on the basis of a random mutagenesis experiment (see the text). G421A was  
385 chosen to test the effect of removing Gly421. C240S/C393S were selected by rational  
386 design (see the text). The overall structure of *PcCel6A* was created by superposing the  
387 structure of the catalytic domain was taken from PDB ID 5XCY,<sup>14)</sup> and the structure of  
388 the carbohydrate-binding module was predicted using Protein Homology/analogy  
389 Recognition Engine V 2.0 (Phyre<sup>2</sup>) on the overall structure of *TrCel6A* modelled  
390 previously.<sup>18)</sup> The points of mutations were introduced into images of these domains  
391 with the PyMOL Molecular Graphics System, Version 1.0.0.0 Schrödinger, LLC.

392

### 393 **Fig. 2.** Protein concentration in yeast culture supernatant.

394 Aliquots of 80  $\mu$ l of yeast culture were sampled for 3 days after induction of  
395 the enzyme expression with methanol, and centrifuged at 4 °C with 10,000 x g for 10  
396 min. The third-day culture was centrifuged at 4 °C with 3,000 x g for 5 min and  
397 centrifuged again at 4 °C with 15,000 x g for 10 min. The protein concentration of the  
398 supernatants was determined using Bio-Rad Protein Assay Dye Reagent Concentrate  
399 (Bio-rad Laboratories, Inc.). The absorbance at 595 nm was measured with a Thermo  
400 Scientific Multiscan<sup>®</sup> GO (Thermo Fisher Scientific).

401

### 402 **Fig. 3.** SDS-PAGE of 15 $\mu$ L *PcCel6A* yeast culture supernatants after digestion with 403 endoglycosidase H and $\alpha$ -mannosidase.

404 The gel was imaged with a CanoScan (Canon Inc.), with 50% exposure time.

405 The image was modified to change the shape of the lanes from trapezoidal to

406 rectangular by using GIMP (Ver. 2.10.14.0, <https://www.gimp.org>) and converted to a  
407 32-bit gray scale with ImageJ. The amount of *PcCel6A* was estimated from the peak  
408 area of bands between 50 and 75 kDa using ImageJ.

409

410 **Fig. 4.** Specific hydrolytic activities towards PASC (A) and cellulose III<sub>I</sub> (B).

411 *PcCel6A* mutants and WT in yeast culture supernatants were incubated at 50  
412 and 60 °C with 0.05% PASC or cellulose III<sub>I</sub>. N = 3. Error bars represent ± 1 standard  
413 deviation.

414

415 **Fig. 5.** Hydrolytic activities towards PASC and cellulose III<sub>I</sub> at 50 °C (A) and 60 °C (B),  
416 and specific activity at 50 °C (C) and 60 °C (D).

417 The reaction conditions were the same as for Fig. 4. N = 3. Error bars represent  
418 ± 1 standard deviation.

419

420 **Fig. 6.** Comparison of the hydrolytic activities at 50 °C and 60 °C towards PASC (A)  
421 and cellulose III<sub>I</sub> (B), and specific activities towards PASC (C) and cellulose III<sub>I</sub> (D).

422 The reaction conditions were the same as for Fig. 4. N = 3. Error bars represent  
423 ± 1 standard deviation.

424

425 **Fig. 7.** Location of the N- and C- terminal loops (A) and the close-up views of Cys240  
426 (B) and Cys393 (C).

427 The structure of the catalytic domain of *PcCel6A* WT was taken from PDB ID  
428 5XCY<sup>14</sup>) and modified with the PyMOL Molecular Graphics System. N- and C-  
429 terminal loops consist of amino acid residues 174-178 (green) and 390-425 (cyan),  
430 respectively. Free cysteine Cys240 and Cys393 are colored orange and shown by sticks.

431 Side chains of the residues around 8 Å from Cys240 and Cys393 are shown by lines.

432 Residues that might be interacting with Cys240 and Cys393 directly or indirectly are

433 (Gln187, Asn362, Cys361 and Cys408) are also represented by sticks.

434

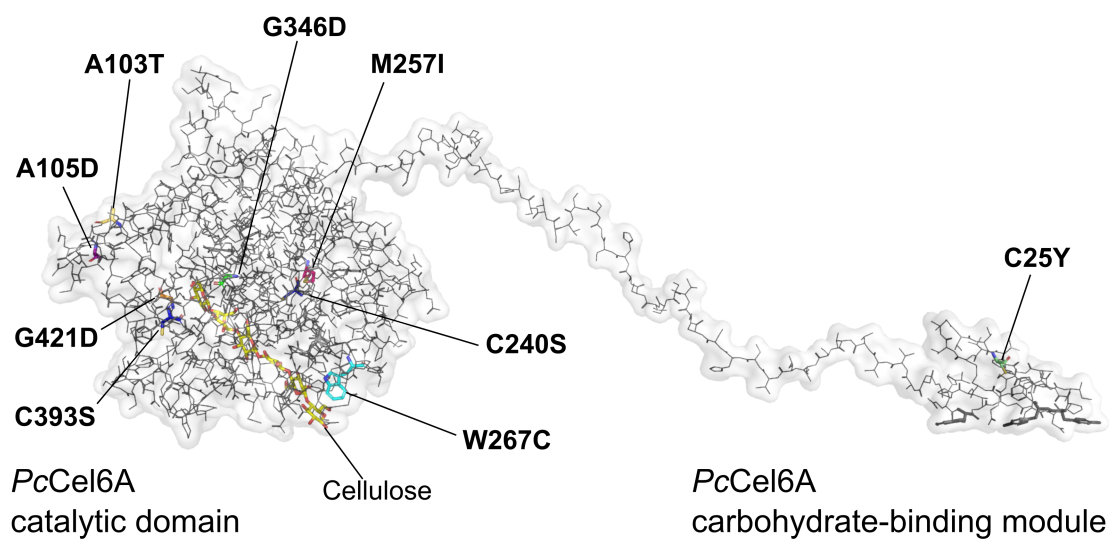

435

436

437 **Fig. 1.**

438

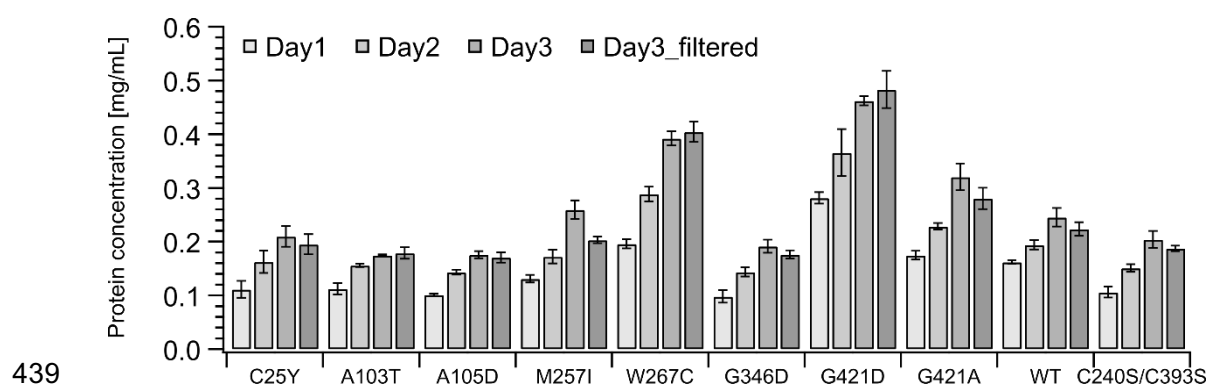

**Fig. 2.**

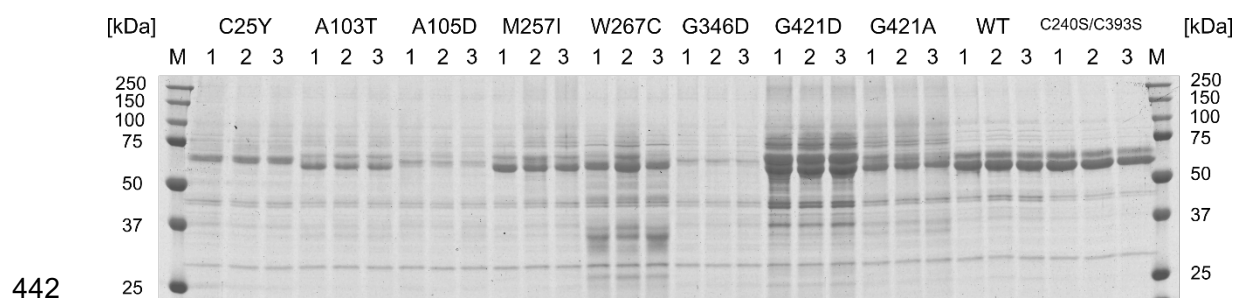

**Fig. 3.**

445

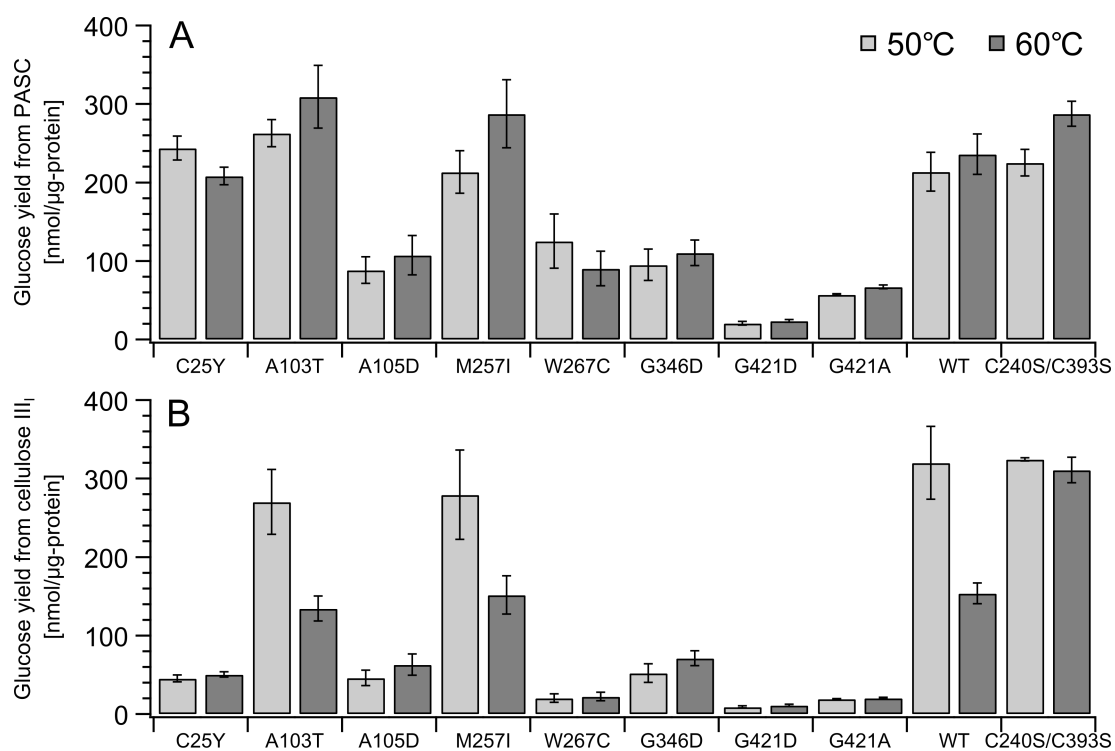

446

447 **Fig. 4.**

448



449

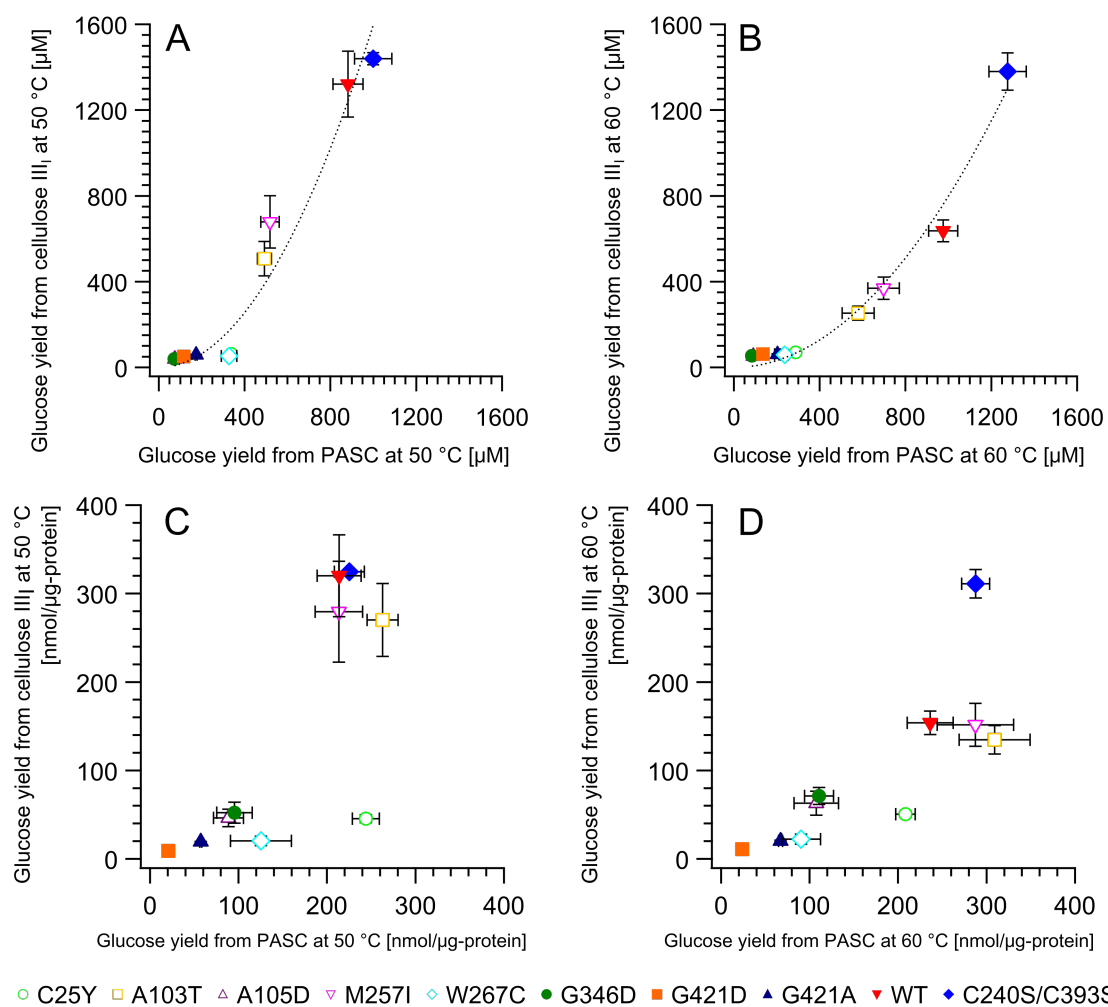

450

451 **Fig. 5.**

452

453

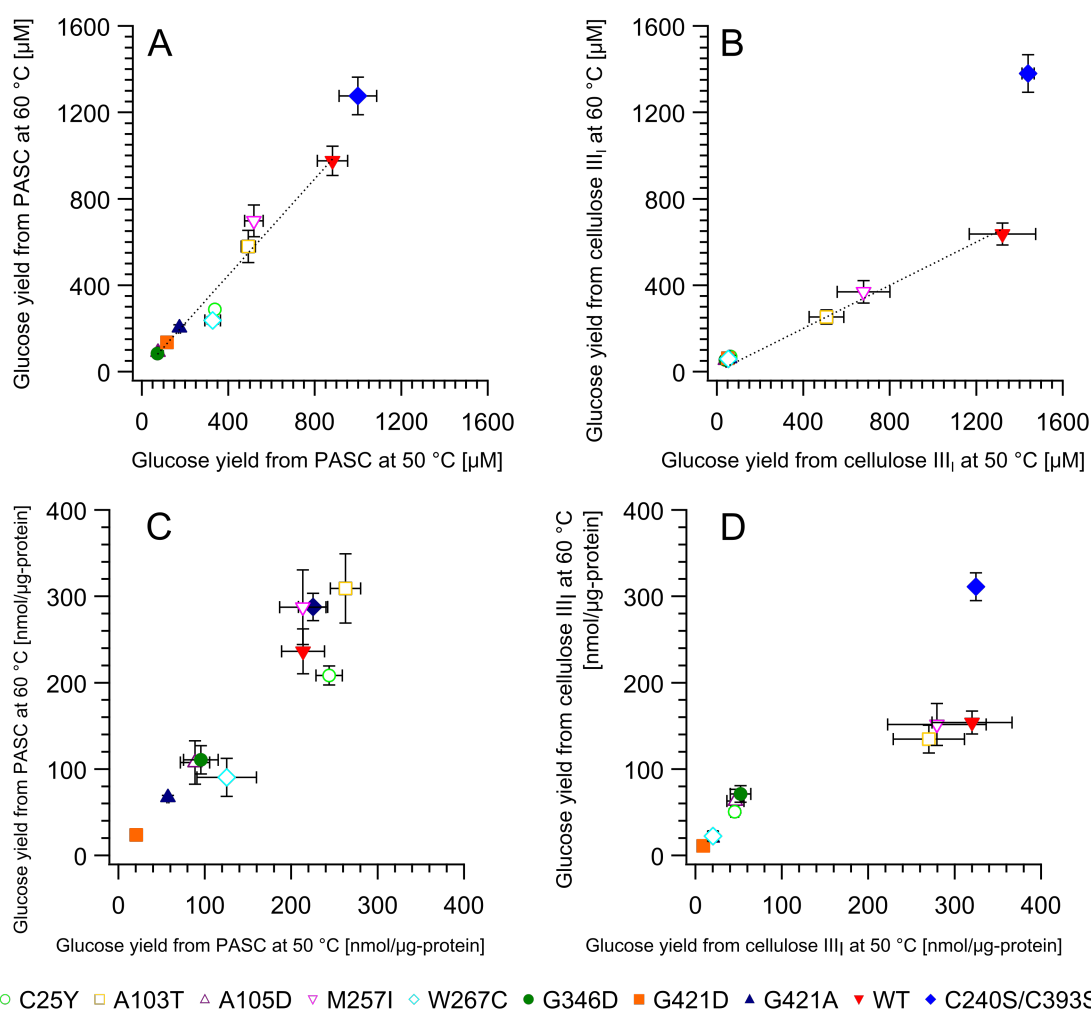

454

455 **Fig. 6.**

456

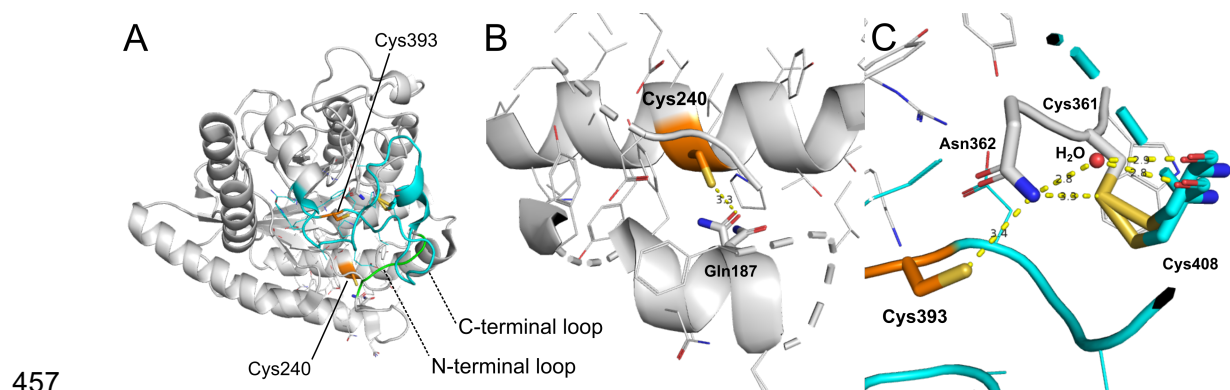

Source: https://www.biorxiv.org/content/10.1101/2020.05.11.089235v1.full.pdf
